# Supplementary material for: Insights in the Development and Uses of Alternatives to Antibiotic Growth Promoters in Poultry and Swine Production
Source: MDPI journal article supplement (doi:10.3390/antibiotics11060766), 2022-06-02
Supplement: s1 [file s1]

Supplementary Material

**Table S1.** General parameters and growth promoting indicators.

| Food animal               | Characteristics                                                                                                       | Observation <sup>a</sup> |
|---------------------------|-----------------------------------------------------------------------------------------------------------------------|--------------------------|
| <b>Broiler</b><br>[59-63] | Colonisation of <i>Campylobacter jejuni</i> and <i>Salmonella enteritidis</i> in the GIT                              | -                        |
|                           | Weight gain                                                                                                           | +                        |
|                           | Bone characteristics, intestinal morphology                                                                           | +                        |
|                           | Immune response                                                                                                       | +                        |
|                           | Lysozyme and T lymphocytes                                                                                            | +                        |
|                           | Production of phytases, lipases, amylases and proteases (stimulate the GIT to secrete digestive enzymes)              | +                        |
|                           | Vitamins, exopolysaccharides and antioxidants                                                                         | +                        |
|                           | Pro-inflammatory and anti-inflammatory reactions                                                                      | +/-                      |
|                           | Regulate pathogen numbers in the GIT                                                                                  | +/-                      |
|                           | Plasma metabolites of blood                                                                                           | -                        |
|                           | Triglyceride, total cholesterol, high-density lipoprotein (HDL), or low-density lipoprotein (LDL)                     | +                        |
|                           | LDL:HDL ratio                                                                                                         | -                        |
|                           | Feed conversion ratio (g feed/g gain)                                                                                 | -                        |
|                           | Average daily gain (ADG)                                                                                              | +                        |
|                           | Feed conversion rate (FCR)                                                                                            | +                        |
| <b>Swine</b><br>[64-67]   | Faecal microbial count: <i>Lactobacilli</i> and <i>Enterobacteriaceae</i> cell counts                                 | +                        |
|                           | Histological analysis: Small intestinal tissues (duodenum, jejunum, and ileum), villous height (VH), crypt depth (CD) | +                        |
|                           | Carcass quality                                                                                                       | +                        |

<sup>a</sup>“+” indicates improvement, enhancement, increase; “-” indicates reduction, negative, decrease
